# Supplementary material for: Sex Difference in the Association between Electronic Cigarette Use and Subsequent Cigarette Smoking among U.S. Adolescents: Findings from the PATH Study Waves 1–4
Source: MDPI journal article supplement (doi:10.3390/ijerph18041695), 2021-02-10
Supplement: s1 [file s1]

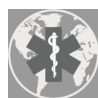

**Table S1.** Items for internalizing and externalizing mental health problems.

| GAIN-SS Subscale <sup>1</sup>        | Items                                                                                            |
|--------------------------------------|--------------------------------------------------------------------------------------------------|
| Internalizing mental health problems | Feeling very trapped, lonely, sad, blue, depressed, or hopeless about the future                 |
|                                      | Sleep trouble - such as bad dreams, sleeping restlessly or falling asleep during the day         |
|                                      | Feeling very anxious, nervous, tense, scared, panicked or like something bad was going to happen |
|                                      | Becoming very distressed and upset when something reminded you of the past                       |
| Externalizing mental health problems | Lied or conned to get things you wanted or to avoid having to do something                       |
|                                      | Had a hard time paying attention at school, work, or home                                        |
|                                      | Had a hard time listening to instructions at school, work, or home                               |
|                                      | Were a bully or threatened other people                                                          |
|                                      | Started physical fights with other people                                                        |
|                                      | Felt restless or the need to run around or climb on things                                       |
|                                      | Gave answers before the other person finished asking the question                                |

<sup>1</sup> GAIN-SS: Global Appraisal of Individual Needs – Short Screener.

**Table S2.** Percentage of ever cigarette smoking at each follow-up wave by covariates at its corresponding baseline wave among baseline never cigarette smokers.

|                                                 | Wave 2 (n = 5001) | Wave 3 (n = 6637)  | Wave 4 (n = 8177)  |
|-------------------------------------------------|-------------------|--------------------|--------------------|
|                                                 | % (95% CI)        | % (95% CI)         | % (95% CI)         |
| P30D e-cigarette use                            |                   |                    |                    |
| Yes                                             | 12.8 (3.6 – 36.5) | 25.6 (14.2 – 41.9) | 18.9 (12.4 – 27.7) |
| No                                              | 2.8 (2.3 – 3.3)   | 2.7 (2.3 – 3.1)    | 3.2 (2.7 – 3.6)    |
| Age group                                       |                   |                    |                    |
| 12–14                                           | 2.8 (2.3 – 3.4)   | 2.3 (2.0 – 2.8)    | 2.3 (1.9 – 2.8)    |
| 15–17                                           | 2.9 (1.2 – 7.0)   | 4.6 (3.6 – 5.9)    | 5.3 (4.4 – 6.3)    |
| Sex                                             |                   |                    |                    |
| Male                                            | 2.6 (1.9 – 3.5)   | 2.8 (2.2 – 3.5)    | 3.8 (3.2 – 4.4)    |
| Female                                          | 3.1 (2.5 – 3.8)   | 3.0 (2.4 – 3.6)    | 3.0 (2.5 – 3.7)    |
| Race/ethnicity                                  |                   |                    |                    |
| Non-Hispanic White                              | 3.1 (2.4 – 3.9)   | 3.7 (3.0 – 4.5)    | 3.9 (3.2 – 4.8)    |
| Non-Hispanic Black                              | 2.6 (1.5 – 4.4)   | 1.4 (0.8 – 2.6)    | 2.1 (1.3 – 3.3)    |
| Non-Hispanic Other                              | 1.6 (0.7 – 3.6)   | 2.7 (1.5 – 4.7)    | 2.5 (1.7 – 3.8)    |
| Hispanic                                        | 2.8 (2.0 – 3.8)   | 2.3 (1.6 – 3.2)    | 3.3 (2.6 – 4.4)    |
| Sexual orientation (ages 14+)                   |                   |                    |                    |
| Straight/Heterosexual                           | 3.6 (2.7 – 4.8)   | 3.5 (2.8 – 4.4)    | 4.2 (3.6 – 5.0)    |
| Gay, lesbian, bisexual, or other                | 10.8 (4.5 – 23.8) | 9.4 (5.8 – 14.8)   | 9.8 (7.3 – 13.2)   |
| Parental education                              |                   |                    |                    |
| Less than high school                           | 4.1 (2.9 – 5.8)   | 2.6 (1.8 – 3.8)    | 4.1 (3.0 – 5.5)    |
| High school graduate                            | 3.3 (2.2 – 4.9)   | 4.2 (3.0 – 5.9)    | 3.7 (2.7 – 5.1)    |
| Some college or associate degree                | 2.9 (2.0 – 4.1)   | 3.2 (2.5 – 4.1)    | 3.7 (3.1 – 4.6)    |
| Bachelor's degree or above                      | 2.1 (1.5 – 2.9)   | 2.1 (1.5 – 2.9)    | 2.7 (2.1 – 3.4)    |
| P30D use of other tobacco products <sup>1</sup> |                   |                    |                    |
| Yes                                             | 4.5 (0.5 – 30.8)  | 8.7 (2.2 – 29.0)   | 21.9 (11.8 – 37.0) |
| No                                              | 2.8 (2.3 – 3.4)   | 2.8 (2.4 – 3.3)    | 3.2 (2.8 – 3.7)    |
| Past year internalizing problems                |                   |                    |                    |
| Low                                             | 1.4 (0.9 – 2.1)   | 1.8 (1.3 – 2.5)    | 2.6 (2.11 – 3.2)   |
| Moderate                                        | 3.7 (2.8 – 5.0)   | 2.9 (2.1 – 4.0)    | 2.8 (2.0 – 4.0)    |

|                                  |                 |                 |                 |
|----------------------------------|-----------------|-----------------|-----------------|
| High                             | 5.2 (4.0 – 6.8) | 5.7 (4.3 – 7.4) | 5.8 (4.8 – 7.1) |
| Past year externalizing problems |                 |                 |                 |
| Low                              | 0.6 (0.3 – 1.2) | 1.9 (1.4 – 2.6) | 2.4 (1.8 – 3.1) |
| Moderate                         | 3.1 (2.3 – 4.3) | 2.5 (1.8 – 3.5) | 3.2 (2.5 – 4.2) |
| High                             | 5.8 (4.6 – 7.3) | 4.6 (3.5 – 5.9) | 5.0 (4.0 – 6.1) |

<sup>1</sup> Other tobacco included cigars (traditional cigars, cigarillos, or filtered cigars), hookah, and smokeless tobacco (snus pouches, loose snus, moist snuff, dip, spit, or chewing tobacco).

**Table S3.** Adjusted odds ratios (aORs) of ever cigarette smoking at 12-month follow-up waves among adolescents (12–17 years of age) who were never cigarette smokers at baseline waves.

|                                                 | <b>Model 1</b>        | <b>Model 2</b>          |
|-------------------------------------------------|-----------------------|-------------------------|
|                                                 | <b>No Interaction</b> | <b>With Interaction</b> |
|                                                 | <b>aOR (95% CI)</b>   | <b>aOR (95% CI)</b>     |
| P30D e-cigarette use                            |                       |                         |
| Yes                                             | 3.17 (1.45 – 6.94)    | 0.86 (0.12 – 6.43)      |
| No                                              | Ref.                  | Ref.                    |
| Sex                                             |                       |                         |
| Male                                            | 0.84 (0.62 – 1.14)    | 0.77 (0.56 – 1.04)      |
| Female                                          | Ref.                  | Ref.                    |
| P30D e-cigarette use # Sex                      |                       |                         |
| Yes # Male                                      |                       | 7.78 (5.01 – 12.08)     |
| No # Female                                     |                       | Ref.                    |
| Age group                                       |                       |                         |
| 12–14                                           | Ref.                  | Ref.                    |
| 15–17                                           | 2.34 (1.63 – 3.36)    | 2.34 (1.63 – 3.35)      |
| Race/ethnicity                                  |                       |                         |
| Non-Hispanic White                              | Ref.                  | Ref.                    |
| Non-Hispanic Black                              | 0.31 (0.15 – 0.64)    | 0.30 (0.14 – 0.63)      |
| Non-Hispanic Other                              | 0.71 (0.38 – 1.32)    | 0.71 (0.38 – 1.32)      |
| Hispanic                                        | 0.53 (0.34 – 0.84)    | 0.53 (0.33 – 0.83)      |
| Parental education                              |                       |                         |
| Less than high school                           | Ref.                  | Ref.                    |
| High school graduate                            | 0.79 (0.47 – 1.34)    | 0.78 (0.47 – 1.32)      |
| Some college or associate degree                | 0.79 (0.48 – 1.30)    | 0.77 (0.47 – 1.27)      |
| Bachelor's degree or above                      | 0.41 (0.24 – 0.69)    | 0.40 (0.24 – 0.67)      |
| P30D use of other tobacco products <sup>1</sup> |                       |                         |
| Yes                                             | 5.07 (1.48 – 17.42)   | 5.73 (1.75 – 18.73)     |
| No                                              | Ref.                  | Ref.                    |
| Internalizing mental health problems            |                       |                         |
| Low                                             | Ref.                  | Ref.                    |
| Moderate                                        | 1.07 (0.65 – 1.75)    | 1.08 (0.66 – 1.77)      |
| High                                            | 1.19 (0.73 – 1.94)    | 1.23 (0.75 – 2.02)      |
| Externalizing mental health problems            |                       |                         |
| Low                                             | Ref.                  | Ref.                    |
| Moderate                                        | 1.33 (0.84 – 2.11)    | 1.35 (0.85 – 2.16)      |
| High                                            | 2.56 (1.64 – 4.00)    | 2.53 (1.63 – 3.92)      |

<sup>1</sup> Other tobacco included cigars (traditional cigars, cigarillos, or filtered cigars), hookah, and smokeless tobacco (snus pouches, loose snus, moist snuff, dip, spit, or chewing tobacco). Ref.: reference group.

**Table S4.** Adjusted ORs<sup>1</sup> from subgroup analysis for adolescent boys and girls.

|                      | Boys ever Cigarette Smoking | Girls ever Cigarette Smoking |
|----------------------|-----------------------------|------------------------------|
|                      | aOR (95% CI)                | aOR (95% CI)                 |
| P30D e-cigarette use |                             |                              |
| Yes                  | 5.81 (3.34 – 10.13)         | 2.31 (0.98 – 5.41)           |
| No                   | Ref.                        | Ref.                         |

<sup>1</sup> Controlling for age, race/ethnicity, parental education, P30D other tobacco use, past-year internalizing mental health problems, and past-year externalizing mental health problems. Ref.: reference group.

**Table S5.** E-cigarette dependence among P30D e-cigarette users for adolescent boys and girls (aged 12–17).

|                                                    | Wave 1 (n = 29) | Wave 2 (n = 54) | Wave 3 (n = 97) |
|----------------------------------------------------|-----------------|-----------------|-----------------|
|                                                    | n (mean/%)      | n (mean/%)      | n (mean/%)      |
| Number of days using an e-cigarette in P30D (mean) |                 |                 |                 |
| Overall                                            | 29 (4.1)        | 54 (4.3)        | 97 (7.5)        |
| Male                                               | 15 (5.0)        | 30 (5.6)        | 60 (8.4)        |
| Female                                             | 14 (3.1)        | 24 (2.9)        | 37 (6.1)        |
| E-cigarette dependence <sup>1</sup> (%)            |                 |                 |                 |
| Low                                                | 27 (93.4)       | 52 (97.3)       | 82 (83.1)       |
| High                                               | 2 (6.6)         | 2 (2.7)         | 15 (16.9)       |
| E-cigarette dependence for boys (%)                |                 |                 |                 |
| Low                                                | 13 (87)         | 28 (94.8)       | 49 (81.9)       |
| High                                               | 2 (13)          | 2 (5.2)         | 11 (18.1)       |
| E-cigarette dependence for girls (%)               |                 |                 |                 |
| Low                                                | 14 (100)        | 24 (100)        | 33 (85.2)       |
| High                                               | 0 (0)           | 0 (0)           | 4 (14.8)        |

<sup>1</sup> Nicotine dependence was dichotomized into low (used an e-cigarette for 1–19 days in P30D) and high (used an e-cigarette for 20–30 days).
